# Supplementary material for: Public versus patient health preferences: protocol for a study to elicit EQ-5D-5L health state valuations for patients who have survived a stay in intensive care
Source: HighWire-hosted journal article supplement (doi:10.1136/bmjopen-2021-058500), 2022-05-01
Supplement: bmjopen-2021-058500supp001_data_supplement.pdf [file bmjopen-2021-058500supp001_data_supplement.pdf]

## Appendix A: Background and contextual questions

| Questions                                                                                                                                                                                         | Answers                                                                                                                                                                                                                                                                                                                                                                                                                                                                                                            |
|---------------------------------------------------------------------------------------------------------------------------------------------------------------------------------------------------|--------------------------------------------------------------------------------------------------------------------------------------------------------------------------------------------------------------------------------------------------------------------------------------------------------------------------------------------------------------------------------------------------------------------------------------------------------------------------------------------------------------------|
| Would you have answered differently before the ICU stay?                                                                                                                                          | Yes/no                                                                                                                                                                                                                                                                                                                                                                                                                                                                                                             |
| Would you have been willing to 'sacrifice' more/fewer years for improvements in quality of life before the ICU stay? Think about the questions where you had to choose between life A and life B. | <ul style="list-style-type: none"> <li>• More</li> <li>• Same</li> <li>• Less</li> <li>• Do not know</li> </ul>                                                                                                                                                                                                                                                                                                                                                                                                    |
| Which dimension is most important for quality of life?                                                                                                                                            | <ul style="list-style-type: none"> <li>• Mobility</li> <li>• Self-care</li> <li>• Usual activities (e.g. work, study, housework, family or leisure activities)</li> <li>• Pain/Discomfort</li> <li>• Anxiety/Depression</li> </ul>                                                                                                                                                                                                                                                                                 |
| Have you experienced life-threatening illness?                                                                                                                                                    | <ul style="list-style-type: none"> <li>• Yes, with myself</li> <li>• Yes, in my immediate family/friends</li> <li>• Yes, through my work</li> <li>• No.</li> </ul>                                                                                                                                                                                                                                                                                                                                                 |
| How would you rate your overall health?                                                                                                                                                           | <ul style="list-style-type: none"> <li>• Excellent</li> <li>• Very good</li> <li>• Good</li> <li>• Less than good</li> <li>• Poor</li> </ul>                                                                                                                                                                                                                                                                                                                                                                       |
| Do you have any long-term illness, long-term after-effects of injury, disability or other long-term illness?<br>By prolonged is meant at least 6 months                                           | Yes/no                                                                                                                                                                                                                                                                                                                                                                                                                                                                                                             |
| If yes, what are the long-term / chronic diseases?                                                                                                                                                | Open                                                                                                                                                                                                                                                                                                                                                                                                                                                                                                               |
| What is most important to you?                                                                                                                                                                    | <ul style="list-style-type: none"> <li>• A good life, regardless of the length of that life</li> <li>• A long life, regardless of the quality of that life</li> <li>• Do not know.</li> </ul>                                                                                                                                                                                                                                                                                                                      |
| How much do you agree with the following statements: "There is a life after death"?                                                                                                               | <ul style="list-style-type: none"> <li>• Strongly agree</li> <li>• Agree</li> <li>• Disagree</li> <li>• Strongly disagree</li> <li>• Do not know</li> <li>• Do not want to answer</li> </ul>                                                                                                                                                                                                                                                                                                                       |
| What is your highest completed education?                                                                                                                                                         | <ul style="list-style-type: none"> <li>• Has none / Other</li> <li>• Elementary school</li> <li>• High school education</li> <li>• Vocational education</li> <li>• Short higher education under 3 years (e.g. social and health assistant, technician, bachelor)</li> <li>• Medium-term higher education 3-4 years (e.g. school teacher, police officer, journalist, social worker, physiotherapist)</li> <li>• Long higher education of more than 4 years (e.g. engineer, M.Sc., doctor, psychologist)</li> </ul> |
| Do you live with others?                                                                                                                                                                          | <ul style="list-style-type: none"> <li>• I live alone</li> <li>• I live with my parents</li> <li>• I live with my spouse/partner</li> <li>• I live with children / children under 16 years</li> <li>• I live with others aged 16 or over</li> </ul>                                                                                                                                                                                                                                                                |
| How is your attachment to the labor market?                                                                                                                                                       | <ul style="list-style-type: none"> <li>• I have a job / self-employed</li> <li>• I am unemployed and receive unemployment benefits</li> <li>• I am unemployed and receiving cash benefits</li> <li>• I'm a student</li> <li>• I am outside the labor market (e.g. pension/early retirement)</li> <li>• Other (e.g. leave or sickness benefits)</li> </ul>                                                                                                                                                          |
| What is your annual income before tax?                                                                                                                                                            | <ul style="list-style-type: none"> <li>• Less than DKK 199,999.</li> <li>• From DKK 200,000 to DKK 299,999.</li> <li>• From DKK 300,000 to DKK 399,999.</li> <li>• From DKK 400,000 to DKK 499,999.</li> <li>• From DKK 500,000.</li> <li>• Do not want to answer/Do not know</li> </ul>                                                                                                                                                                                                                           |
| What is your ethnic origin?                                                                                                                                                                       | <ul style="list-style-type: none"> <li>• Danish</li> <li>• Descendant (Western)</li> <li>• Descendant (Non-Western)</li> <li>• Immigrant (Western)</li> <li>• Immigrants (Non-Western)</li> <li>• Do not want to answer/Do not know</li> </ul>                                                                                                                                                                                                                                                                     |
| What is your age?                                                                                                                                                                                 | 1-100 years                                                                                                                                                                                                                                                                                                                                                                                                                                                                                                        |
| What is your gender?                                                                                                                                                                              | <ul style="list-style-type: none"> <li>• Male</li> <li>• Female</li> <li>• Other</li> <li>• Do not want to answer</li> </ul>                                                                                                                                                                                                                                                                                                                                                                                       |

|                                                                                     |                                                                                                                                                                                                                                                                                                                                                                                                                                                                                                        |
|-------------------------------------------------------------------------------------|--------------------------------------------------------------------------------------------------------------------------------------------------------------------------------------------------------------------------------------------------------------------------------------------------------------------------------------------------------------------------------------------------------------------------------------------------------------------------------------------------------|
| Do you have children?                                                               | Yes/no                                                                                                                                                                                                                                                                                                                                                                                                                                                                                                 |
| What is the children's age?                                                         | 0-100 years                                                                                                                                                                                                                                                                                                                                                                                                                                                                                            |
| What were you admitted to the intensive care unit for?                              | <ul style="list-style-type: none"> <li>• Trauma (e.g. car accident, other accident)</li> <li>• Sudden illness (e.g. poisoning, cardiac arrest)</li> <li>• Long-term disease that got worse (e.g. cancer, kidney disease)</li> <li>• Planned hospitalization (e.g. after surgery)</li> <li>• Other (please describe)</li> <li>• Do not want to answer/Do not know</li> </ul>                                                                                                                            |
| Did the hospitalization come suddenly or was it part of a longer course of illness? | <ul style="list-style-type: none"> <li>• Sudden</li> <li>• Part of longer course of illness</li> </ul>                                                                                                                                                                                                                                                                                                                                                                                                 |
| How long did it take before you recovered from the hospitalization?                 | <ul style="list-style-type: none"> <li>• 0-3 months</li> <li>• 3-12 months</li> <li>• More than 12 months</li> <li>• Not yet</li> <li>• Do not want to answer / Do not know</li> </ul>                                                                                                                                                                                                                                                                                                                 |
| Are you back today at the same level of health as before the hospitalization?       | <ul style="list-style-type: none"> <li>• Yes, completely</li> <li>• Yes. Mentally, but not physically</li> <li>• Yes. Physically, but not mentally</li> <li>• No, slightly deteriorating health (a. Mental, b. Physical)</li> <li>• No, very deteriorating state of health (a. Mental, b. Physical)</li> <li>• Other: please describe</li> </ul>                                                                                                                                                       |
| Have you or a close family member had COVID-19 since your ICU stay?                 | <ul style="list-style-type: none"> <li>• Yes, I have</li> <li>• Yes, a close family member have</li> <li>• Yes, both</li> <li>• No</li> </ul>                                                                                                                                                                                                                                                                                                                                                          |
| If yes, how serious was it?                                                         | <p>For me:</p> <ul style="list-style-type: none"> <li>• Required admission to hospital</li> <li>• Required admission to ICU</li> <li>• Many symptoms but no need for hospital admission</li> <li>• Few days or less of symptoms</li> </ul> <p>For close family member:</p> <ul style="list-style-type: none"> <li>• Required admission to hospital</li> <li>• Required admission to ICU</li> <li>• Many symptoms but no need for hospital admission</li> <li>• Few days or less of symptoms</li> </ul> |
| To interviewer: Where did the interview take place?                                 | <ul style="list-style-type: none"> <li>• At home</li> <li>• Hospital</li> <li>• Other, where?</li> </ul>                                                                                                                                                                                                                                                                                                                                                                                               |
